# Supplementary material
Source: PubMed Central journal article supplement (PMC3964478)
Supplement: NIHMS454927-supplement-1.pdf [file NIHMS454927-supplement-1.pdf]

# Chemotherapy-induced bone marrow nerve injury impairs hematopoietic regeneration

Daniel Lucas, Christoph Scheiermann, Andrew Chow, Yuya Kunisaki, Ingmar Bruns, Colleen Barrick, Lino Tessarollo & Paul S. Frenette

## 1. Supplementary Figures

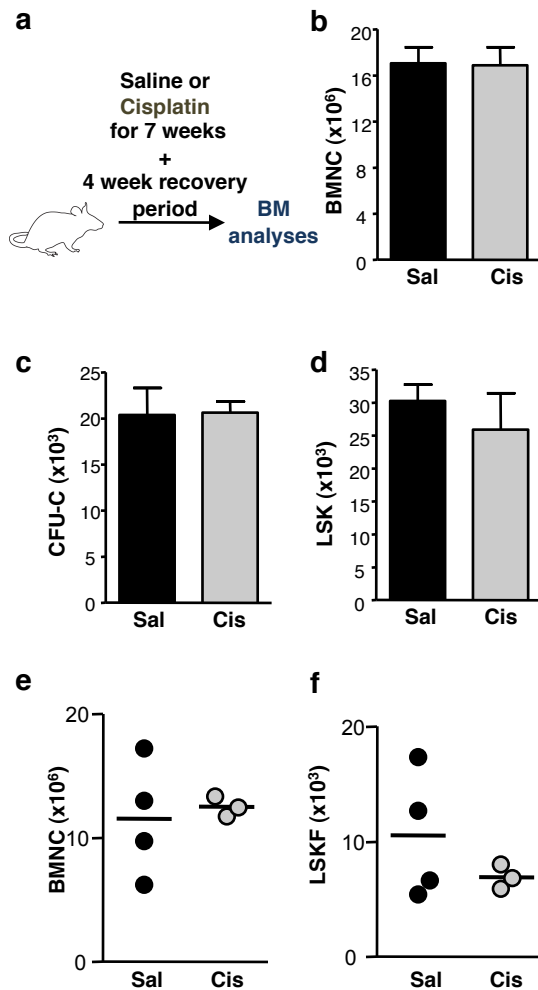

**Supplementary Figure 1.** Cisplatin treatment does not affect HSC numbers in the BM. **(a)** Experimental design to determine the effect of cisplatin on steady-state hematopoiesis. **(b-d)** Number of **(b)** bone marrow nucleated cells, **(c)** CFU-C, and **(d)** Lin<sup>-</sup>Sca1<sup>+</sup>c-kit<sup>+</sup> (LSK) cells per femur in saline ( $n = 5$ ) or cisplatin-treated ( $n = 7$ ) mice, 4 weeks after the last cisplatin injection. **(e-f)** Number of **(e)** bone marrow nucleated cells, and **(f)** Lin<sup>-</sup>Sca1<sup>+</sup>c-kit<sup>+</sup>Flt3<sup>+</sup> (LSKF) cells per femur in saline or cisplatin-treated) mice, 8 weeks after the last cisplatin injection.
