# Supplementary material
Source: PubMed Central journal article supplement (PMC3964478)
Supplement: NIHMS454927-supplement-2.pdf [file NIHMS454927-supplement-2.pdf]

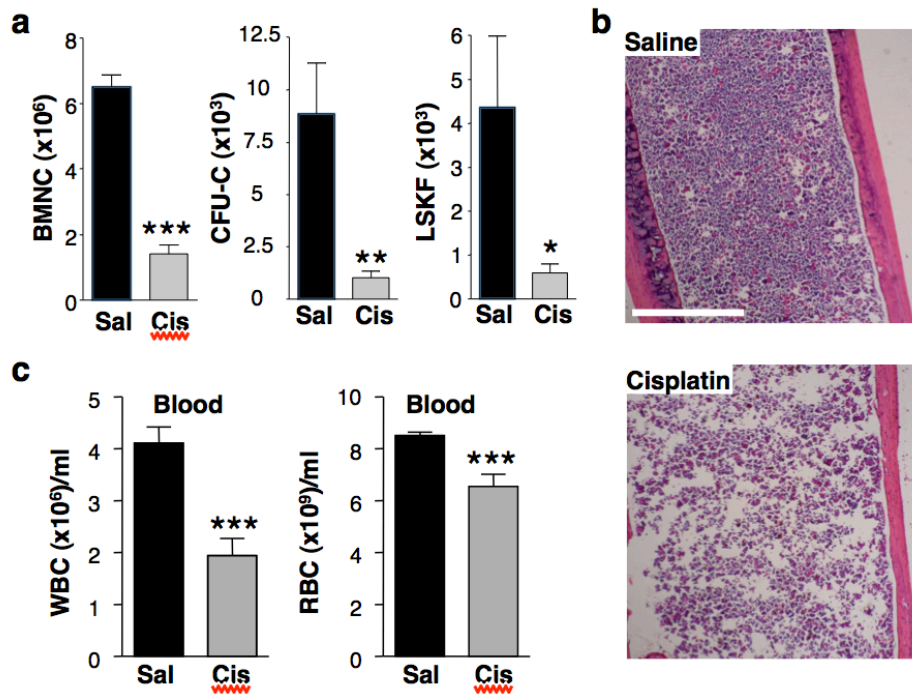

**Supplementary Figure 2.** Cisplatin treatment impairs hematopoietic recovery after transplantation. **(a)** BMNC, colony-forming units in culture (CFU-C) and  $\text{Lin}^- \text{Sca1}^+ \text{c-kit}^+ \text{flt3}^-$  cells (LSKF) counts per femoral bone marrow in saline or cisplatin-treated 4 weeks after transplantation ( $n = 5-7$ ). **(b)** HE stains of the femur of a saline or cisplatin-treated mice 4 weeks after transplantation. Scale bar 250  $\mu\text{m}$ . **(c)** Number of white blood cells (WBC) and red blood cells (RBC) in the blood of saline- or cisplatin-treated mice, 4 weeks after transplantation.
