# Supplementary material
Source: PubMed Central journal article supplement (PMC3964478)
Supplement: NIHMS454927-supplement-3.pdf [file NIHMS454927-supplement-3.pdf]

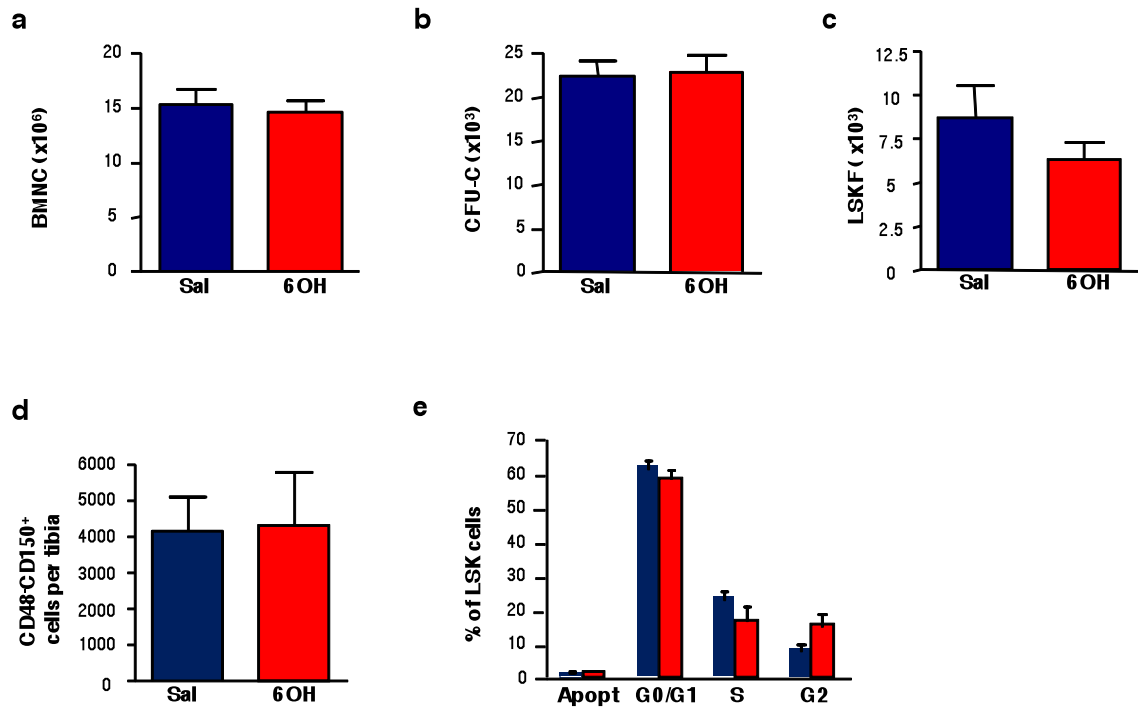

**Supplementary Figure 3.** Chemical sympathectomy with 6-hydroxydopamine (6OHDA) does not induce significant changes in hematopoietic stem, progenitor and differentiated cells in the bone marrow in the steady state. **(a-d)** Number of **(a)** BMNC, **(b)** CFU-C, **(c)** LSKF cells per femur, and **(d)** CD150<sup>+</sup>CD48<sup>-</sup> cells in mice treated with saline ( $n = 5-10$ ) or 6OHDA ( $n = 3-13$ ). BM analyses were performed 3 days after the last injection of 6OHDA. **(e)** Cell cycle analysis (by measuring BrdU incorporation) in Lin<sup>-</sup>Sca1<sup>+</sup>c-kit<sup>+</sup> cells purified from the BM of mice treated with saline ( $n = 7$ ) or 6OHDA ( $n = 6$ ), 3 days after the last injection of 6OHDA. Apopt: Apoptotic cells.
