# Supplementary material
Source: PubMed Central journal article supplement (PMC3964478)
Supplement: NIHMS454927-supplement-4.pdf [file NIHMS454927-supplement-4.pdf]

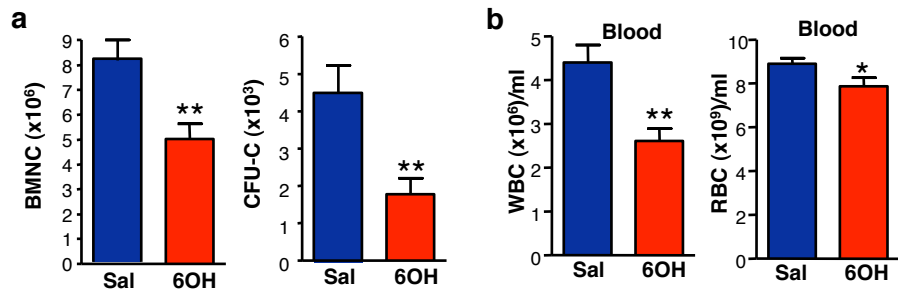

**Supplementary Figure 4.** The SNS is required for BM and blood recovery after transplantation. **(a)** Number of BMNC and CFU-C per femur in saline ( $n = 7$ ) or 6OHDA-treated ( $n = 8$ ) transplanted mice, 4 weeks after transplantation. **(b)** Number of white blood cells (WBC) and red blood cells (RBC) in the blood of saline- or 6OHDA-treated mice, 4 weeks after transplantation.
