# Supplementary material
Source: PubMed Central journal article supplement (PMC3964478)
Supplement: NIHMS454927-supplement-5.pdf [file NIHMS454927-supplement-5.pdf]

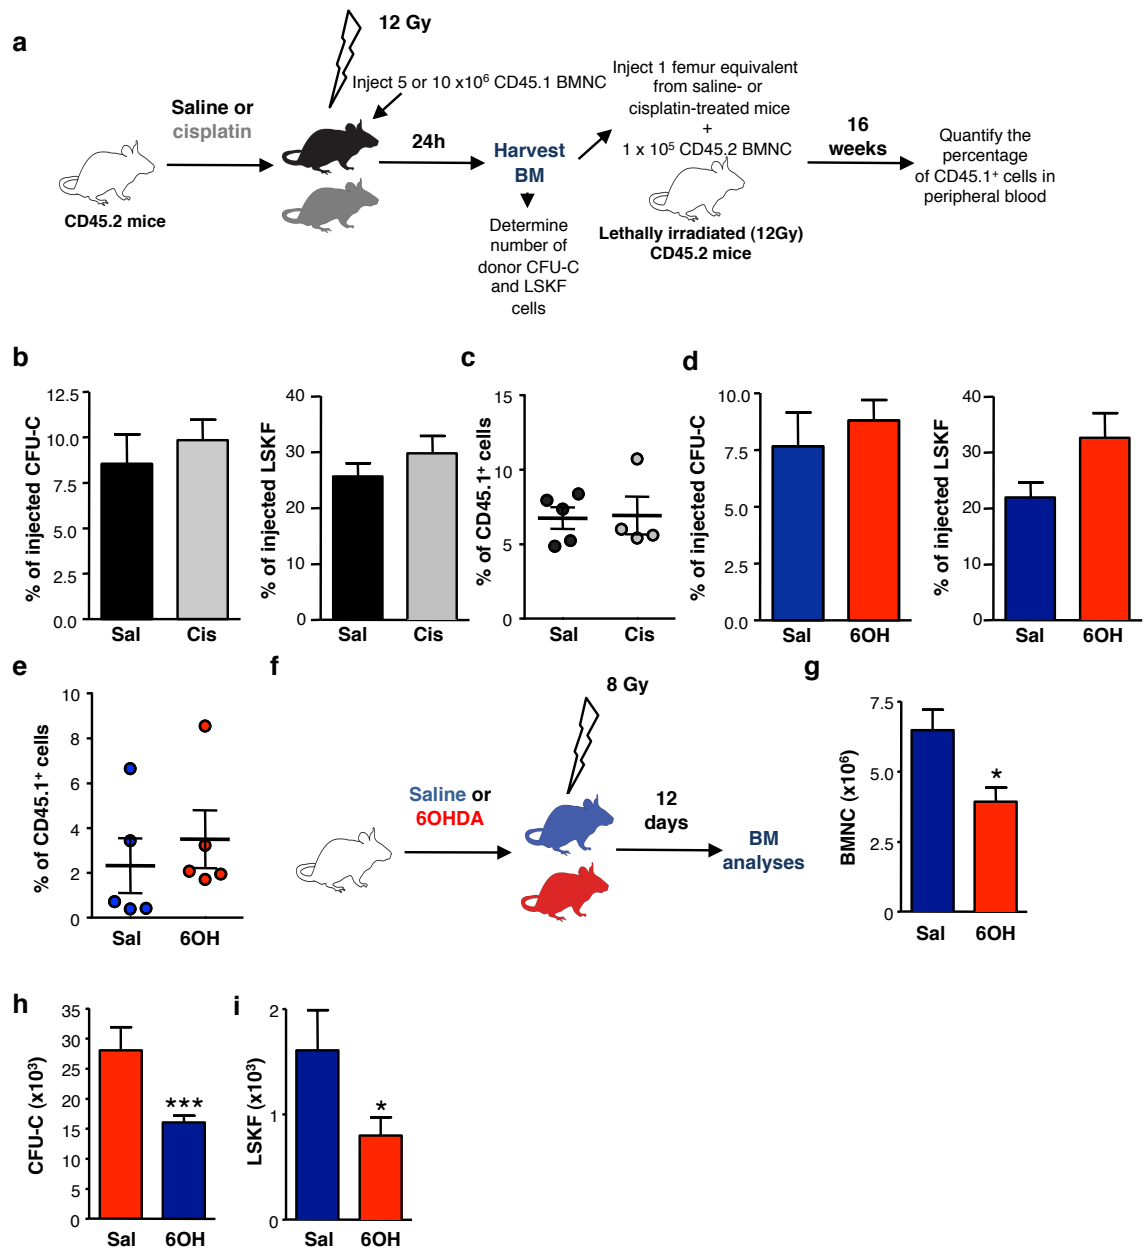

**Supplementary Figure 5.** No defect in HSPC homing efficiency after 60HDA or cisplatin treatment. (a) Experimental design to determine the efficiency of HSC homing to the BM of saline- or cisplatin-treated mice. (b) Percentage of donor CFU-C (left) or LSKF cells (right) detected in the BM of saline- (black) or cisplatin- (grey) treated mice 24h after lethal irradiation (1200 rads) and injection of  $5 \times 10^6$  (CFU-C) or  $10 \times 10^6$  (LSKF) donor BMNC ( $n = 4-7$ ). (c) Percentage of CD45.1<sup>+</sup> cells in peripheral blood of CD45.2<sup>+</sup> recipient mice 16 weeks after competitive transplant as depicted in a. (d) Percentage of donor CFU-C (left) or LSKF cells (right) detected in the BM of saline- (blue) or 60HDA- (red) mice 24h after lethal irradiation (1200 rads) and injection of  $5 \times 10^6$  (CFU-C) or  $10 \times 10^6$  (LSKF) donor BMNC ( $n = 4-6$ ). (e) Percentage of CD45.1<sup>+</sup> cells in peripheral blood of CD45.2<sup>+</sup> recipient mice 16 weeks after competitive transplant as depicted in a but with saline- or 60HDA-treated mice. (f) Experimental design to determine whether sublethal irradiation of 60HDA-treated mice also results in reduced BM recovery. (g-i) Number of BMNC (g), CFU-C (h), and LSKF cells (i) per femur in saline or 60HDA-treated mice 12 days after sublethal irradiation ( $n = 3-7$ ).
