# Supplementary material
Source: PubMed Central journal article supplement (PMC3964478)
Supplement: NIHMS454927-supplement-6.pdf [file NIHMS454927-supplement-6.pdf]

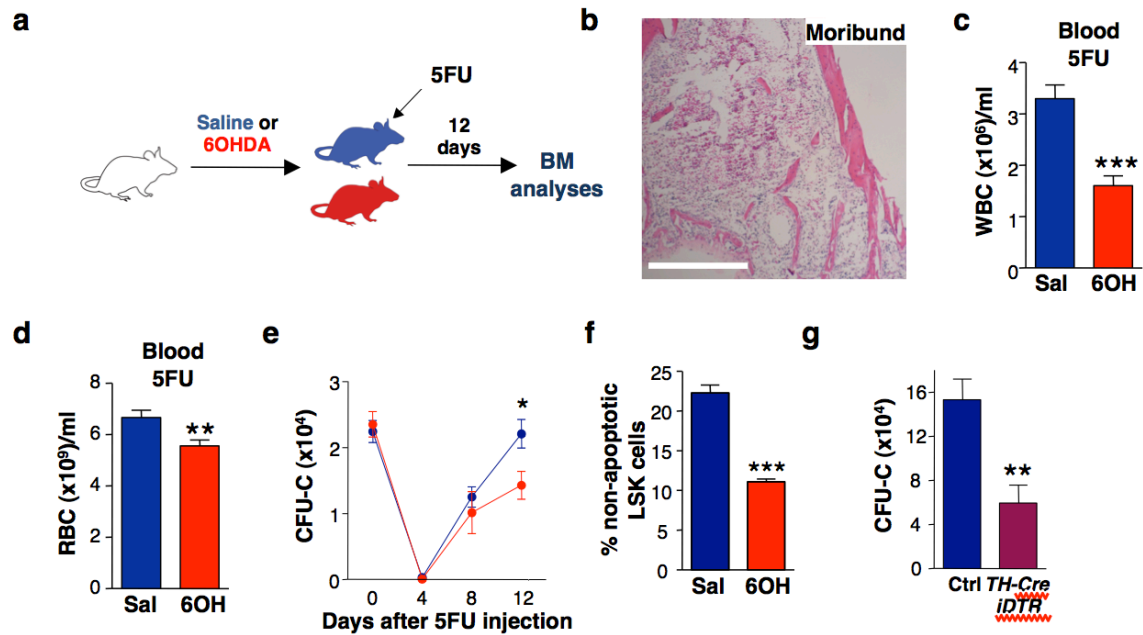

**Supplementary Figure 6.** The sympathetic nervous system is required for BM recovery after 5FU injection. **(a)** Experimental design to determine the effect of 6OHDA-induced SNS lesion on BM regeneration after 5FU challenge. **(b)** HE stain of the femur of a moribund, 6OHDA-treated mice 9 days after 5FU injection. Scale bar 250  $\mu$ m. **(c-d)** Number of white blood cells (WBC) **(c)** and red blood cells (RBC) **(d)** in the blood of saline- or 6OHDA-treated mice, 12 days after 5FU injection. **(e)** Number of CFU-C per femur in saline- or 6OHDA-treated mice at days 0 ( $n = 10-13$ ), 4 ( $n = 15-16$ ), 8 ( $n = 14-16$ ) and 12 ( $n = 25-28$ ) after 5FU injection. **(f)** Eight days after 5FU injection, LSK cells in 6OHDA-treated mice showed reduced viability as measured by Annexin V stain. **(g)** Number of CFU-C per femur in the BM of *Th-Cre*<sup>+</sup>:*iDTR*<sup>-/-</sup> and *Th-Cre*<sup>-</sup>:*iDTR*<sup>+/-</sup> (Ctrl) or *Th-Cre*<sup>+</sup>:*iDTR*<sup>+/-</sup> (Th-Cre:iDTR) mice after diphtheria toxin treatment and 5FU injection ( $n = 6$ ).
