# Supplementary material
Source: PubMed Central journal article supplement (PMC3964478)
Supplement: NIHMS454927-supplement-7.pdf [file NIHMS454927-supplement-7.pdf]

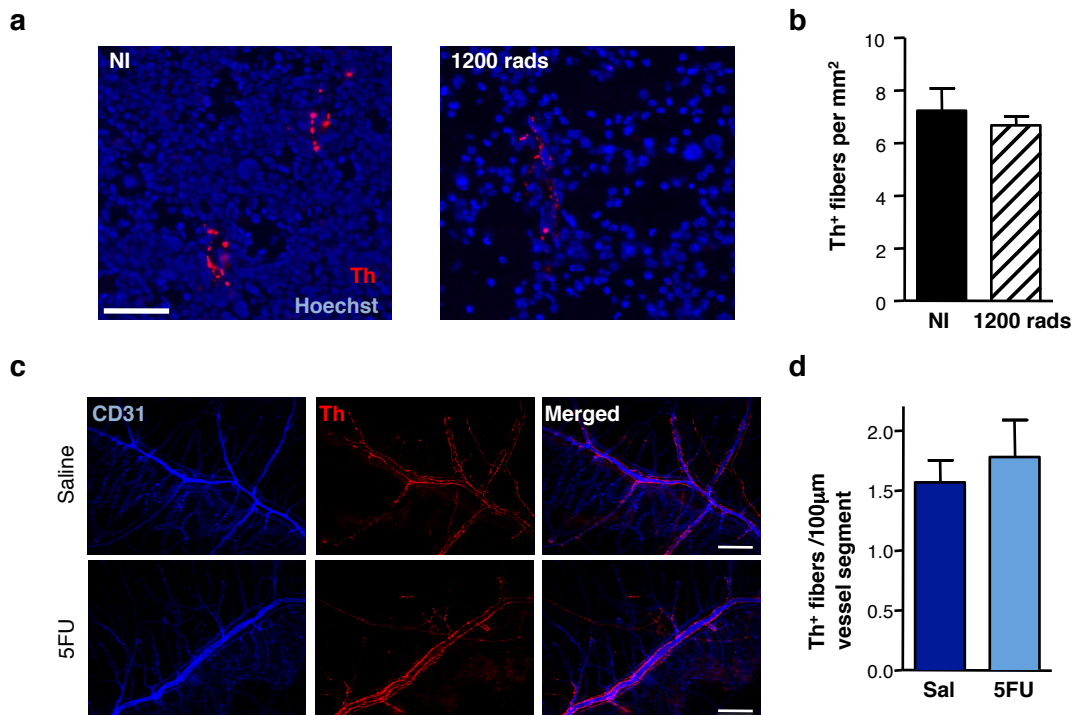

**Supplementary Figure 7.** Lethal irradiation or 5FU injection do not overtly injure BM SNS fibers. **(a)** Representative immunofluorescence staining for Th<sup>+</sup> (Th, red) sympathetic nerve fibers in the BM of control (NI, non-irradiated) or irradiated mice (1200 rads) 48h after irradiation. Scale bar 50 μm. **(b)** Quantification of Th<sup>+</sup> fibers in the BM 48h after lethal irradiation ( $n = 5-6$ ). **(c)** Representative immunofluorescence staining for Th<sup>+</sup> sympathetic nerve fibers in the calvarial BM of saline- or 5FU-injected mice 48h after 5FU injection. (Th: red; CD31: blue). Scale bar 100 μm. **(d)** Quantification of Th<sup>+</sup> fibers in the calvaria 48h after 5FU injection ( $n = 3$ ).
