# Supplementary material
Source: PubMed Central journal article supplement (PMC3964478)
Supplement: NIHMS454927-supplement-8.pdf [file NIHMS454927-supplement-8.pdf]

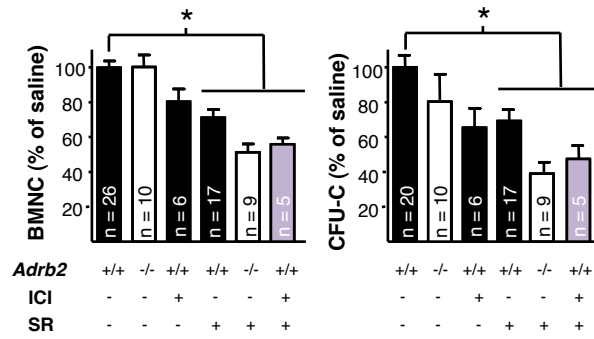

**Supplementary Figure 8.** The sympathetic nervous system promotes BM recovery through  $\beta$ 2- and  $\beta$ 3-adrenergic receptors. To determine which adrenergic receptor(s) was required for 5FU-induced BM regeneration, wild-type or *Adrb2*<sup>-/-</sup> mice were injected with saline, ICI118551 (a specific  $\beta$ 2 antagonist) or SR59230A (a specific  $\beta$ 3 antagonist) for three consecutive days and then challenged with 5FU. The panels show the number of BMNC and CFU-C, per femur in the BM of WT or *Adrb2*<sup>-/-</sup> mice treated with saline, SR59230A (SR) or ICI118551 (ICI) ( $n = 5-26$ ).
