# Supplementary material
Source: PubMed Central journal article supplement (PMC3964478)
Supplement: NIHMS454927-supplement-9.pdf [file NIHMS454927-supplement-9.pdf]

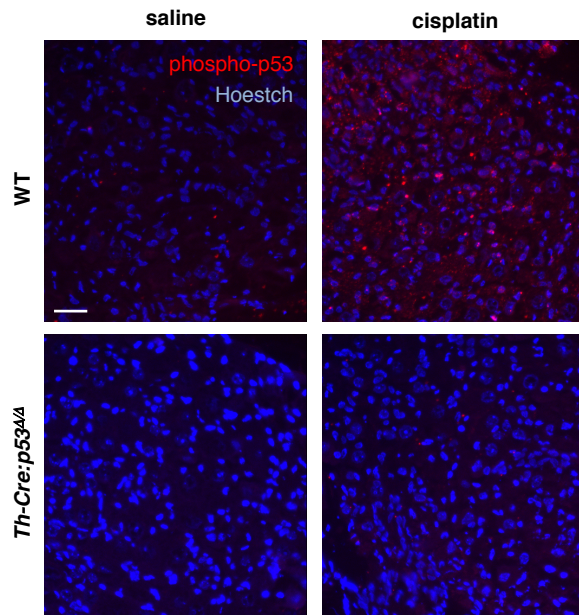

**Supplementary Figure 9.** Cisplatin induces p53 activation in sympathetic neurons. Representative immunofluorescence staining for phospho-p53 in murine superior cervical ganglia of WT or *Th-Cre;p53<sup>Δ/Δ</sup>* mice 12h after saline or cisplatin injection. Scale bar 25  $\mu$ m
