# Supplementary material
Source: PubMed Central journal article supplement (PMC3964478)
Supplement: NIHMS454927-supplement-10.pdf [file NIHMS454927-supplement-10.pdf]

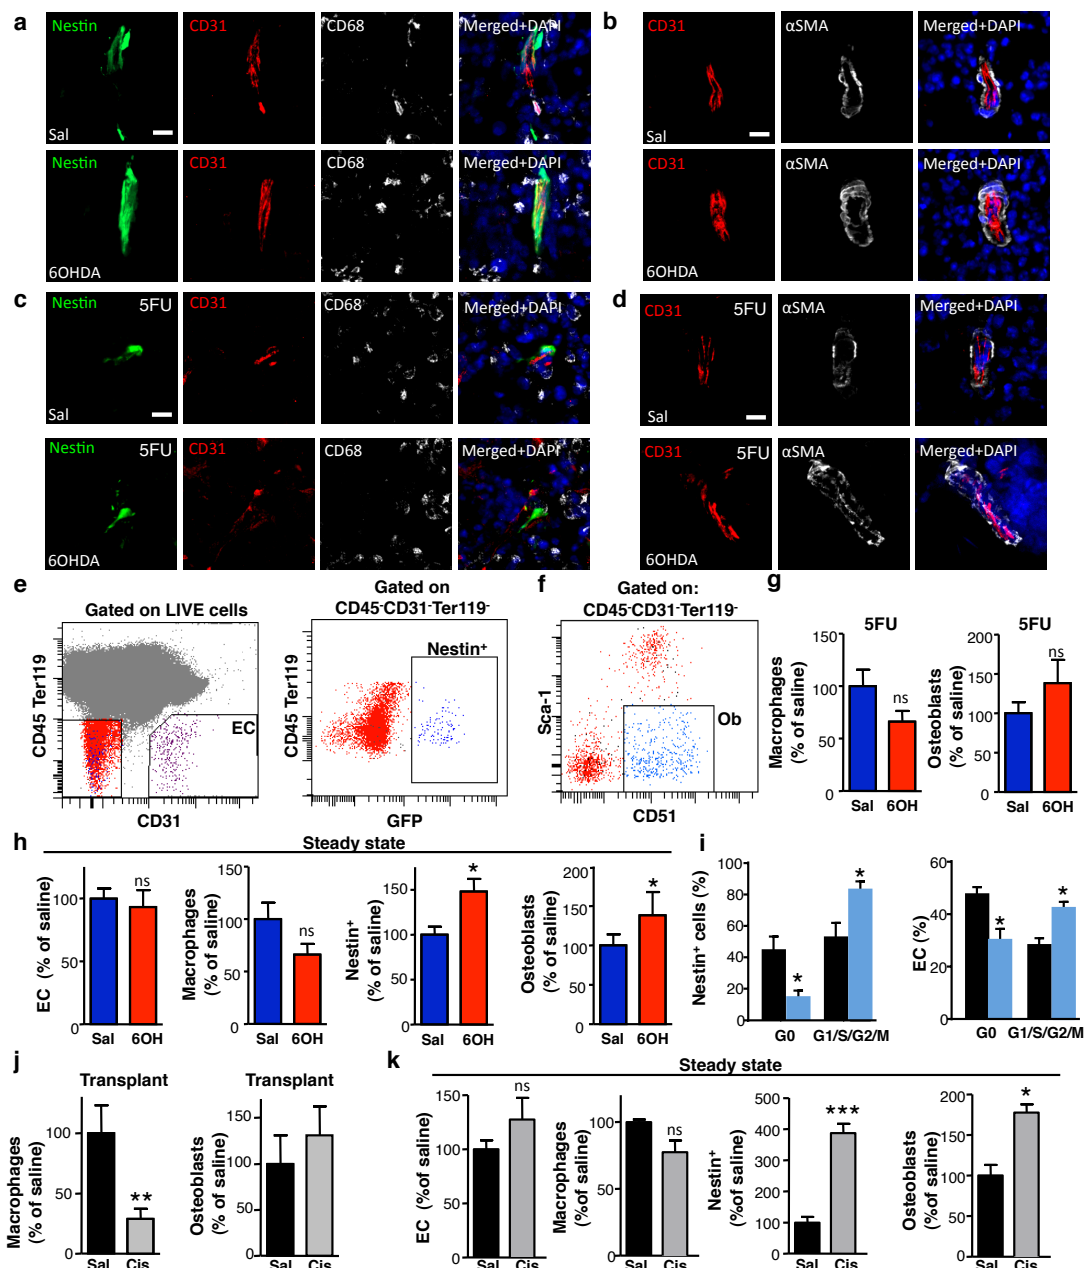

**Supplementary Figure 10.** Analyses of the hematopoietic microenvironment in saline or 6OHDA-sympathectomized mice. **(a,b)** Representative immunofluorescence staining for Nestin-GFP<sup>+</sup> (green) endothelial cells (CD31; red), monocyte/macrophages (CD68, white) **(a)** or perivascular a-smooth muscle actin (αSMA) positive cells and endothelial cells (CD31; red) in the BM of saline or 6OHDA-treated *Nestin-gfp* mice prior 5FU injection. **(c,d)** as a,b but 12 days after 5FU injection. **(e,f)** Gating strategy for flow cytometry analyses of BM Nestin-GFP<sup>+</sup> and endothelial cells (EC) **(e)** or bone osteoblasts (Ob) **(f)**. **(g)** Percentage of macrophages per femur and osteoblasts in bone in saline or 6OHDA treated *Nestin-gfp* mice 12 days after 5FU injection. **(h)** Percentage of endothelial cells, BM macrophages and Nestin-GFP<sup>+</sup> cells per femur, or osteoblasts in bone in saline or 6OHDA treated *Nestin-gfp* mice in the steady state (3 days after the last 6OHDA injection;  $n = 5-8$ ). **(i)** Cell cycle analyses of Nestin-gfp cells and endothelial cells after treatment with saline (black) or ICI118551 and SR59230A (blue);  $n = 4-5$ . **(j)** Percentage of macrophages per femur and osteoblasts in bone in saline or cisplatin treated *Nestin-gfp* mice 4 weeks after transplantation of  $10^6$  BMNC. ( $n = 4$ ). **(k)** Percentage of endothelial cells, BM macrophages and Nestin-GFP<sup>+</sup> cells per femur, or osteoblasts in bone in saline or cisplatin treated *Nestin-gfp* mice in the steady state (4 weeks after the last cisplatin injection;  $n = 5-7$ ). Scale bar 50  $\mu\text{m}$
