# Supplementary material
Source: PubMed Central journal article supplement (PMC3964478)
Supplement: NIHMS454927-supplement-11.pdf [file NIHMS454927-supplement-11.pdf]

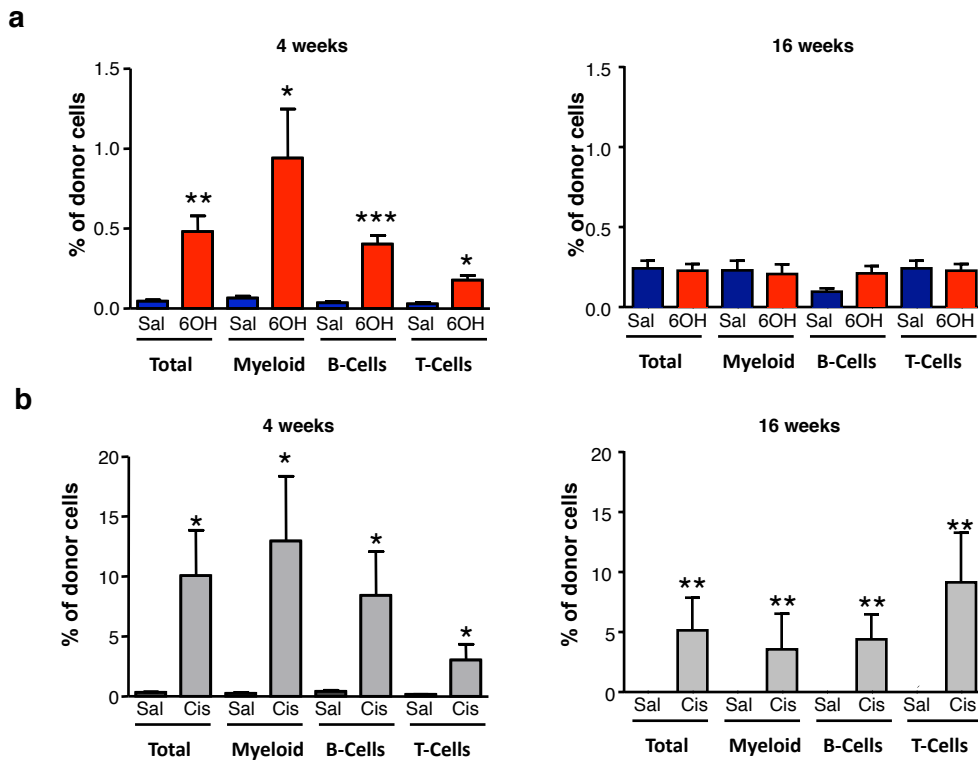

**Supplementary Figure 11.** Increased engraftment without BM conditioning in SNS-injured mice. **(a)** To determine whether niche function was impaired after SNS injury saline (Sal) or 6OHDA (6OH) treated mice were injected with  $10^7$  BMNC three days after the last 6OHDA injection. The donor contribution to peripheral blood lineages was determined 4 or 16 weeks later ( $n = 5$ ) **(b)** To determine whether niche function was impaired after cisplatin saline (Sal) or cisplatin- (Cis) treated mice were injected with  $10^7$  BMNC 4 weeks after the last cisplatin injection. The donor contribution to peripheral blood lineages was determined 4 or 16 weeks later ( $n = 4-7$ ).
