# Supplementary material
Source: PubMed Central journal article supplement (PMC3964478)
Supplement: NIHMS454927-supplement-12.pdf [file NIHMS454927-supplement-12.pdf]

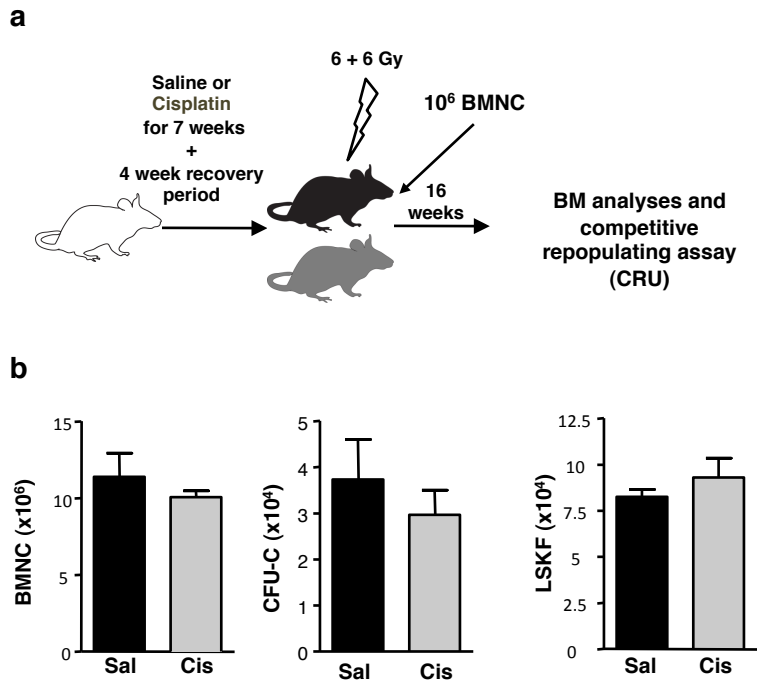

**Supplementary Figure 12.** Bone marrow regeneration is complete 4 months after bone marrow transplant in cisplatin-treated mice. **(a)** Experimental design to determine the effect of cisplatin on long-term BM recovery after transplantation. **(b)** BMNC, CFU-C, and LSKF cells per femur in saline or cisplatin-treated mice, 4 months after bone marrow transplantation of 10<sup>6</sup> BMNC ( $n = 5$ ).
