# Supplementary material
Source: PubMed Central journal article supplement (PMC3964478)
Supplement: NIHMS454927-supplement-14.pdf [file NIHMS454927-supplement-14.pdf]

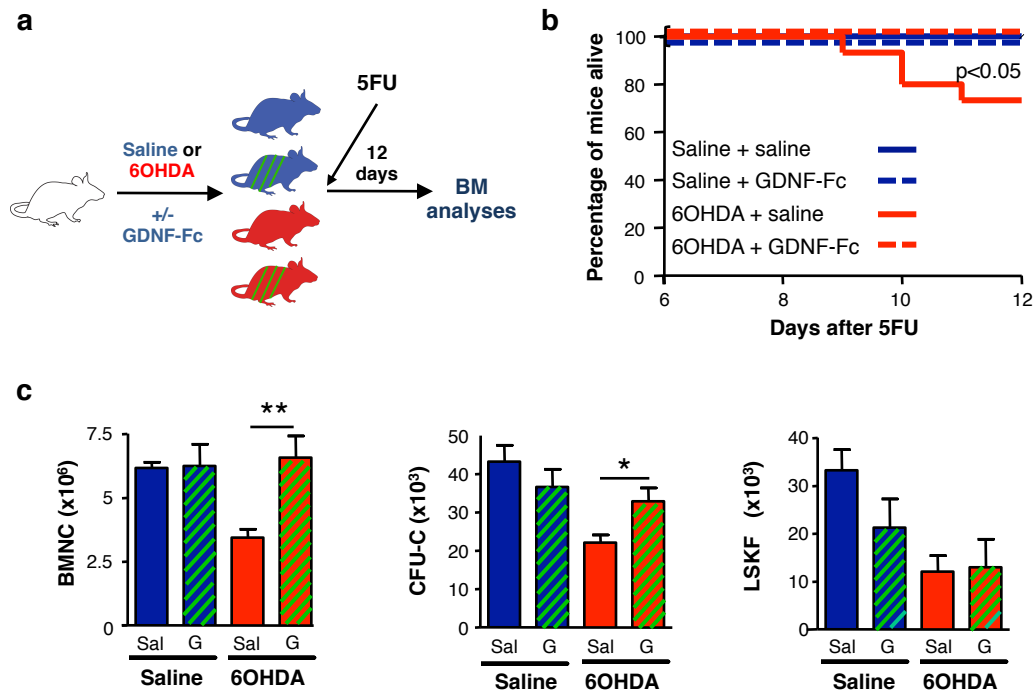

**Supplementary Figure 14.** GDNF-Fc restores normal BM regeneration after 5FU injection in 6OHDA-lesioned mice. **(a)** Experimental design. **(b)** Survival of mice following the protocol depicted in a;  $n = 7-29$ . **(c)** Number of BMNC, CFU-C, and LSKF cells per femur 12 days after 5FU injection;  $n = 5-15$ . Importantly, in this case, GDNF-Fc was not sufficient to accelerate the recovery of LSKF cells. This may be due to the reduced dose of GDNF-Fc used ( $25 \mu\text{g}$  vs.  $70 \mu\text{g}$  in cisplatin-treated mice (see supplementary methods) and that, for cisplatin-treated mice, GDNF-Fc is administered for a longer time (14 days vs. 9 days).
