# Supplementary material
Source: PubMed Central journal article supplement (PMC3964478)
Supplement: NIHMS454927-supplement-15.pdf [file NIHMS454927-supplement-15.pdf]

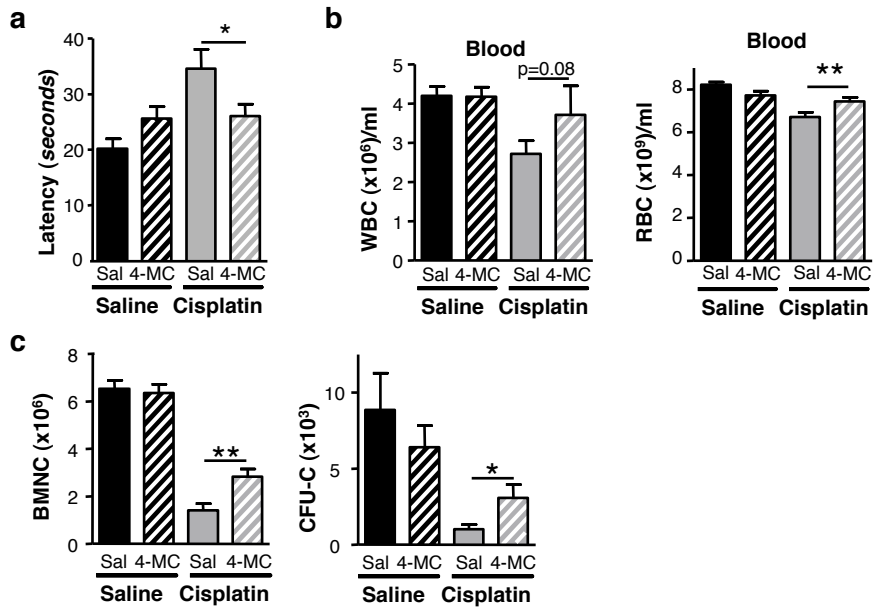

**Supplementary Figure 15.** 4-MC neuroprotection accelerates BM recovery after cisplatin treatment. **(a)** 4-MC treatment reduced sensory neuropathy as determined by a nociception assay ( $n = 7-10$  mice per group). **(b)** Number of white blood cells (WBC) and red blood cells (RBC) in the blood of saline or cisplatin-treated mice after 4-MC neuroprotection and 4 weeks after transplantation ( $n = 5-7$ ). **(c)** Number of BMNC and CFU-C per femur in the BM of mice analyzed as in a.
