# Supplementary material
Source: PubMed Central journal article supplement (PMC3964478)
Supplement: NIHMS454927-supplement-16.pdf [file NIHMS454927-supplement-16.pdf]

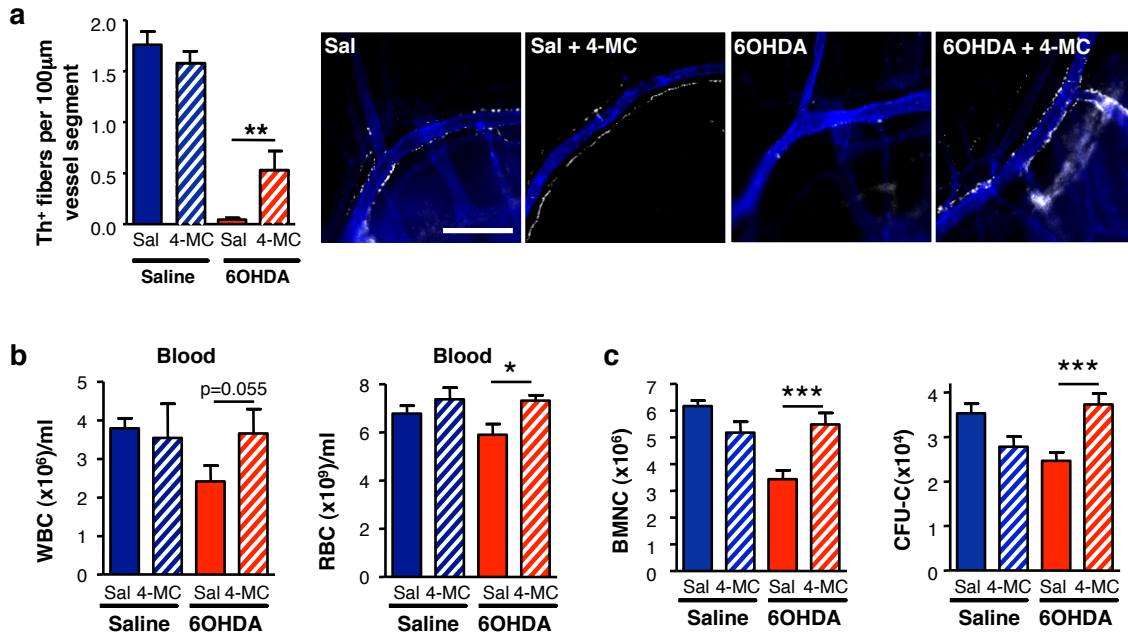

**Supplementary Figure 16.** 4-MC neuroprotection accelerates blood and BM recovery after sympathectomy. (a) Quantification of Th<sup>+</sup> fibers in the calvarial BM of mice treated with saline, 6OHDA and 4-MC, 12 days after 5FU injection (Left Panel). Right Panels: representative immunofluorescence images of whole-mount calvaria with vessel (CD31<sup>+</sup> (blue))-associated Th<sup>+</sup> nerves (white). Images corresponding to the Th channel were renormalized using a gamma value of 1.16. Scale bar, 100 µm. (b) Number of white blood cells (WBC) and red blood cells (RBC) in the blood of mice treated as indicated in Fig. 4a, 12 days after 5FU injection ( $n = 4-9$ ). (c) BMNC and CFU-C per femur in the BM of mice analyzed in a, 12 days after 5FU injection ( $n = 5-7$ ).
