# Supplementary material
Source: PubMed Central journal article supplement (PMC3964478)
Supplement: NIHMS454927-supplement-17.pdf [file NIHMS454927-supplement-17.pdf]

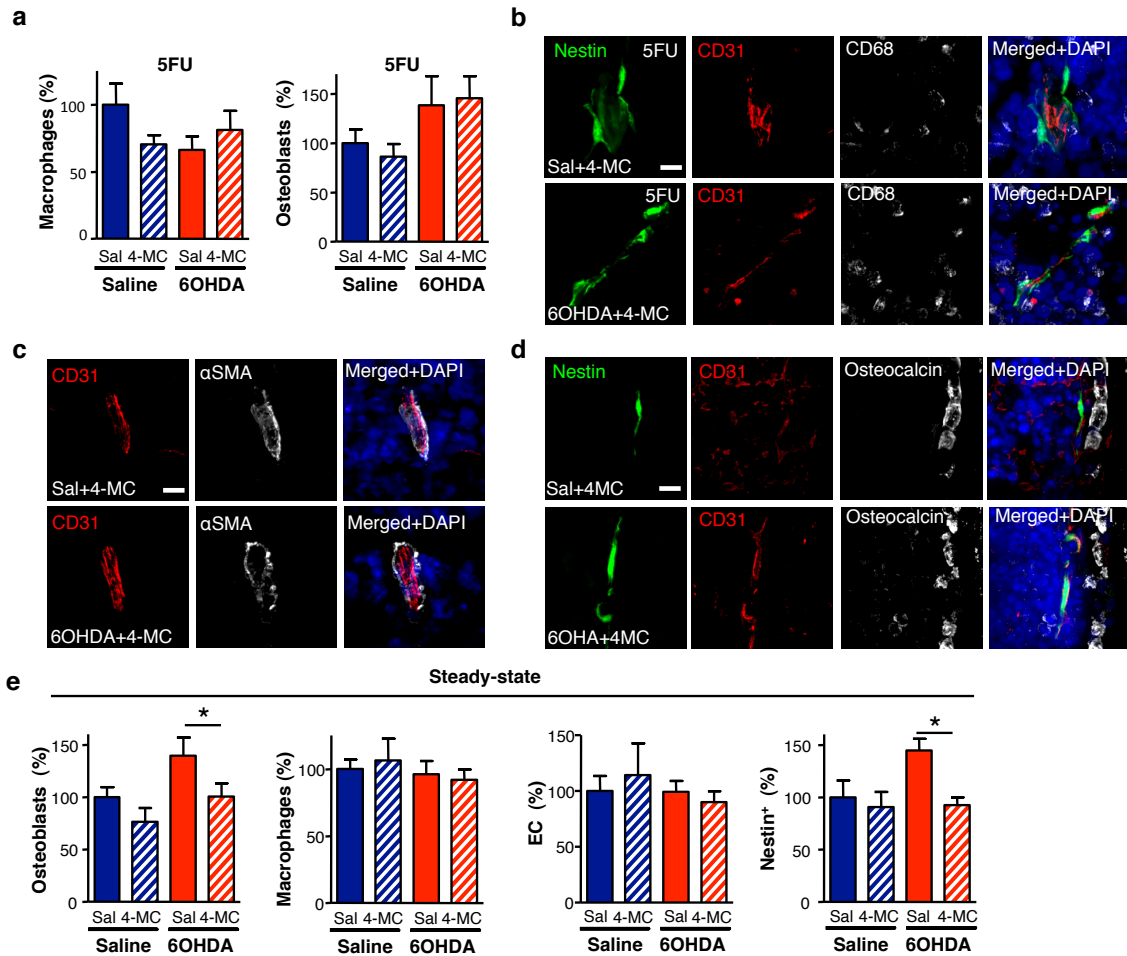

**Supplementary Figure 17.** Effect of 4-MC neuroprotection on the hematopoietic microenvironment. (a) Percentage of BM macrophages per femur or osteoblasts in bone in saline or 6OHDA treated mice after 4-MC neuroprotection and 12 days after 5FU injection ( $n = 5-11$ ). (b) Representative immunofluorescence images of Nestin-gfp (green), endothelial cells (CD31; red), monocyte/macrophages (CD68, white) in the BM of *Nestin-gfp* mice with saline or 6OHDA and 4-MC; 12 days after 5FU injection. (c,d) Representative immunofluorescence images of (c) endothelial cells (CD31; red) and  $\alpha$ -smooth muscle actin<sup>+</sup> cells ( $\alpha$ SMA; white) or (d) Nestin-gfp (green), endothelial cells (CD31; red) and osteoblasts (osteocalcin, white) in the BM of mice treated with saline or 6OHDA and 4-MC; in steady-state. (e) Number of osteoblasts per bone or macrophages, endothelial cells and Nestin<sup>+</sup> cells per femoral BM in *Nestin-gfp* mice after 6OHDA and 4-MC treatment ( $n = 6-11$ ). Scale bar 50  $\mu$ m.
