# Supplementary material
Source: PubMed Central journal article supplement (PMC3964478)
Supplement: NIHMS454927-supplement-18.pdf [file NIHMS454927-supplement-18.pdf]

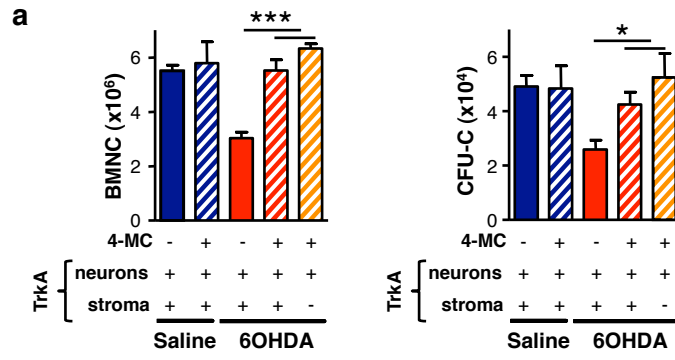

**Supplementary Figure 18.** 4-MC induces neuroprotection by acting specifically on neurons. **(a)** Number of BMNC and CFU-C per femur in WT or *Tal-Cre:TrkA<sup>Neo/Neo</sup>* mice treated with 6OHDA and 4-MC 12 days after 5FU injection ( $n = 3-8$ ).
