# Supplementary material
Source: PubMed Central journal article supplement (PMC3964478)
Supplement: NIHMS454927-supplement-19.pdf [file NIHMS454927-supplement-19.pdf]

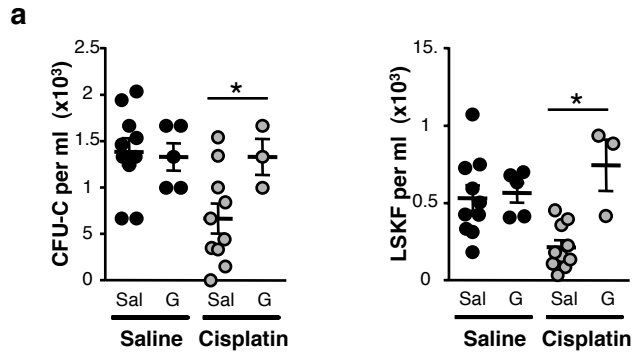

**Supplementary Figure 19.** GDNF-Fc neuroprotection restores G-CSF mobilization in cisplatin-treated mice. **(a)** Number of CFU-C (left) and LSKF (right) counts per ml of blood in saline (Sal) or cisplatin-treated mice after GDNF-Fc (G) neuroprotection and G-CSF mobilization. Please note that to reduce the number of experimental mice used, the experiments shown in Supplementary Fig. 19 and Fig. 6h were performed simultaneously. Hence saline or cisplatin-treated mice in Supplementary Fig. 19 are the same as those in Fig. 6h.
