# Supplementary material
Source: PubMed Central journal article supplement (PMC3964478)
Supplement: NIHMS454927-supplement-20.pdf [file NIHMS454927-supplement-20.pdf]

**Supplementary Table 1.** Impaired blood cell recovery in cisplatin-treated mice after transplantation. Complete blood counts (CBC) of saline ( $n = 3-5$ ), cisplatin ( $n = 3-4$ ) or moribund cisplatin-treated mice at the indicated time points after transplantation of  $10^6$  BMNC.

|                    | Days after BMT | WBC $\times 10^6/\text{ml}$ | RBC $\times 10^9/\text{ml}$ | Hgb (g/dl) | HCT %  | MCV fL   | MCH pg    | MCHC g/dL | CHCM g/dL | CH pg    | RDW %    | HDW g/dL | PLT $\times 10^6/\text{ml}$ | MPV fL   |
|--------------------|----------------|-----------------------------|-----------------------------|------------|--------|----------|-----------|-----------|-----------|----------|----------|----------|-----------------------------|----------|
| Saline             | 9              | 0.5±0.03                    | 6.9±0.6                     | 11±1       | 36±1.5 | 49.5±0.8 | 15±0.5    | 30.4±1    | 29.6±0.3  | 14.6±0.1 | 16.1±1   | 2.3±0.1  | 73.3±18.5                   | 11±0.81  |
|                    | 10             | 0.6±0.1                     | 6.7±0.4                     | 9±0.6      | 33±1.7 | 49.3±1   | 13 ±0.3   | 26.4±0.4  | 29.9±0.1  | 14.7±0.3 | 20.8±1.5 | 2.4±0.1  | 53.3±13.3                   | 9.3±1.6  |
|                    | 12             | 0.9±0.1                     | 6±0.5                       | 8.3±0.9    | 32±3.2 | 52.9±1   | 13.9±0.6  | 26.3±0.7  | 28.1±0.1  | 14.8±0.3 | 23±0.4   | 2.4±0.1  | 90±17.3                     | 14.9±1.4 |
|                    | 13             | 1.2±0.1                     | 5.2±0.5                     | 7.8±1      | 28±2.3 | 55.4±1.3 | 15 ±1.1   | 27.9±2.1  | 27.8±0.2  | 14.8±0.1 | 19.6±0.3 | 2.6±0.1  | 375±55.6                    | 18.7±4   |
| Cisplatin          | 9              | 0.6±0.2                     | 5.8±0.8                     | 8±1.5      | 29±4.1 | 51.1±0.9 | 14±0.5    | 27.4±1    | 28.8±0.3  | 14.7±0.1 | 16.2±1.2 | 2.1±0.1  | 80±17.3.                    | 11.1±0.4 |
|                    | 10             | 0.4±0.1                     | 5.8±1.2                     | 8±2.1      | 28±6.2 | 47.5±1   | 13.2 ±1   | 27.8±1.5  | 28.9±0.5  | 13.6±0.1 | 16.8±0.5 | 2.2±0.1  | 45.7±24.1                   | 9.8±1.4  |
|                    | 12             | 0.2                         | 4.4±0.4                     | 5±0.6      | 21±1.2 | 46.8±2.6 | 11.2 ±0.6 | 23.9±0.5  | 28.2±0.8  | 13±0.3   | 23.1±0.7 | 2.7±0.2  | 86.7±14.5                   | 14.3±4.3 |
|                    | 13             | 1.2±0.3                     | 5.9±0.3                     | 9.3±0.8    | 31±6.2 | 52.6±3.8 | 15.7 ±0.7 | 29.7±0.6  | 27.7±0.1  | 14.6±0.5 | 15.7±1.2 | 2.2±0.1  | 302±121.7                   | 11±0.8   |
| Cisplatin moribund | 9              | 0.1                         | 5.6                         | 7          | 20     | 36.3     | 11.9      | 32.8      | 32.1      | 11.6     | 14.8     | 2.32     | 260                         | 27.9     |
|                    | 9              | 0.6                         | 6.5                         | 8          | 27     | 41.1     | 12.3      | 29.9      | 30.8      | 12.6     | 19.8     | 2.38     | 140                         | 16.5     |
|                    | 9              | 0.3                         | 7.6                         | 8          | 30     | 39.1     | 11.1      | 28.3      | 30.5      | 11.9     | 18.1     | 2.19     | 300                         | 9.1      |
|                    | 10             | 0.3                         | 3                           | 3          | 16     | 46.2     | 10        | 21.7      | 31.3      | 14.3     | 26.1     | 3.25     | 40                          | 9.6      |
|                    | 12             | 0.6                         | 3.2                         | 4          | 18     | 56.1     | 11.7      | 20.9      | 27.3      | 15.1     | 30.7     | 3.57     | 30                          | 10.1     |
|                    | 13             | 0.3                         | 4.4                         | 4          | 18     | 40.7     | 8.7       | 21.4      | 29.4      | 11.8     | 24.9     | 3        | 240                         | 9.9      |

WBC: white blood cells; RBC: red blood cells; Hgb: hemoglobin; HCT: hematocrit; MCV: mean cell volume; MCH: mean corpuscular hemoglobin content; MCHC: mean corpuscular hemoglobin concentration; CHCM: cell hemoglobin concentration mean; CH: corpuscular hemoglobin; RDW: red cell distribution width; HDW: hemoglobin distribution width; PLT: platelets; MPV: mean platelet volume.
