# Supplementary material
Source: PubMed Central journal article supplement (PMC3964478)
Supplement: NIHMS454927-supplement-21.pdf [file NIHMS454927-supplement-21.pdf]

**Supplementary Table 2.** Reduced BM HSC content in cisplatin- or vincristine-treated mice after transplantation. Reduced competitive repopulation ability in the BM of vincristine- or cisplatin-treated mice 4 weeks days after transplantation.

| <b>Agent</b>       | <b>Percentage of donor engraftment</b> | <b>RU per 10<sup>5</sup> BMNC</b> | <b>Estimated RU per femur</b> |
|--------------------|----------------------------------------|-----------------------------------|-------------------------------|
| <b>Saline</b>      | 41.51 ± 4.37                           | 0.76 ± 0.13                       | 40.87 ± 6.85                  |
| <b>Cisplatin</b>   | 30.79 ± 3.56*                          | 0.47 ± 0.08*                      | 7.04 ± 1.2                    |
| <b>Vincristine</b> | 18.26 ± 4.39*                          | 0.24 ± 0.08**                     | 11.53 ± 3.76                  |
| <b>Carboplatin</b> | 36.60 ± 6.26                           | 0.66 ± 0.21                       | 37.64 ± 12.12                 |

For this analysis 10<sup>5</sup> BMNC (CD45.1<sup>+</sup>) purified from saline, cisplatin, vincristine or carboplatin-treated mice 4 weeks after transplantation were mixed with 10<sup>5</sup> BMNC CD45.2<sup>+</sup> competitor cells and transplanted into CD45.2<sup>+</sup> recipients; 16 weeks later the percentage of donor (CD45.1<sup>+</sup>) cells in the blood was determined by flow cytometry and the repopulating unit (RU) frequency calculated. (n=5–7) \*p<0.05 when compared to saline-treated mice.
