# Supplementary material
Source: PubMed Central journal article supplement (PMC3964478)
Supplement: NIHMS454927-supplement-22.pdf [file NIHMS454927-supplement-22.pdf]

**Supplementary Table 3.** Impaired blood cell recovery in 6OHDA-treated mice after genotoxic insult. Complete blood counts (CBC) of saline ( $n = 3-5$ ), 6OHDA ( $n = 3-5$ ) or moribund 6OHDA-treated mice at the indicated time points after injection of 5FU ( $250 \text{ mg kg}^{-1}$ ).

|                | Days after BMT | WBC $\times 10^6/\text{ml}$ | RBC $\times 10^9/\text{ml}$ | Hgb (g/dl) | HCT %  | MCV fL    | MCH pg   | MCHC g/dL | CHCM g/dL | CH pg    | RDW %    | HDW g/dL | PLT $\times 10^6/\text{ml}$ | MPV fL   |
|----------------|----------------|-----------------------------|-----------------------------|------------|--------|-----------|----------|-----------|-----------|----------|----------|----------|-----------------------------|----------|
| Saline         | 8              | 1.8±0.3                     | 5.7±0.4                     | 6.8±1.6    | 26±1.3 | 45.6±0.5  | 11.7±0.4 | 25.5±0.6  | 30.4±0.4  | 13.9±0.1 | 8.7±2    | 1.4±0.1  | 906±333                     | 8±0.2    |
|                | 9              | 1.9±0.5                     | 5.1±0.7                     | 6±1.1      | 22±3.2 | 44.43±0.7 | 10.8±0.8 | 24.4±1.9  | 31.7±0.5  | 14.1±0.1 | 11.1±0.1 | 1.7±0.05 | 1745±532                    | 7.3±0.1  |
|                | 10             | 2.1±0.9                     | 3±0.7                       | 4.4±1.4    | 14±3.2 | 47.1±0.6  | 13.1±2.3 | 28±5.1    | 29.3±0.2  | 13.8±0.1 | 11.8±0.4 | 1.6±0.1  | 1732±555                    | 9±0.3    |
|                | 11             | 3.3±0.9                     | 3.2±0.4                     | 5±0.9      | 15±1.9 | 48.6±1    | 14.9±1.2 | 30.7±5.5  | 28.1±0.4  | 13.6±0.1 | 13.5±1.7 | 1.7±0.1  | 2846±445                    | 9.8±40.1 |
| 6OHDA          | 8              | 1.3±0.5                     | 6.2±1                       | 7.8±1.4    | 22±6.7 | 44.8±0.2  | 12.1±0.5 | 26.9±0.9  | 30.9±0.3  | 13.8±0.1 | 10.9±0.1 | 1.6±0.03 | 356±83.5                    | 8.4±0.4  |
|                | 9              | 1.5±0.5                     | 3.7±0.2                     | 3.8±1.1    | 16±1.2 | 43.4±0.4  | 11.5±0.9 | 26.5±18   | 32.2±0.5  | 14±0.1   | 11.2±0.1 | 1.9±0.1  | 732±151                     | 7.3±1.4  |
|                | 10             | 1±0.2                       | 3.1±0.5                     | 5±0.4      | 14±2.1 | 46.6±0.4  | 15.6±1.3 | 33.2±2.7  | 28.9±0.1  | 13.7±0.1 | 11.3±0.1 | 1.6±0.01 | 2053±41                     | 9.8±0.2  |
|                | 11             | 2.9±0.1                     | 2.8±0.5                     | 4.6±0.9    | 12±1.3 | 48.3±0.2  | 15.7±0.9 | 32.6±1.9  | 28±0.2    | 13.5±0.1 | 12.5±0.2 | 1.7±0.1  | 2826±18                     | 10.3±0.2 |
| 6OHDA moribund | 8              | 0.9                         | 3.0                         | 3          | 12     | 40.4      | 9.9      | 24.5      | 32.8      | 13.3     | 13       | 2.34     | 410                         | 11.3     |
|                | 8              | 1.5                         | 5.3                         | 6          | 22     | 41.5      | 10.7     | 25.9      | 31.2      | 12.9     | 12.2     | 1.74     | 620                         | 10.9     |
|                | 9              | 0.1                         | 2.8                         | 3          | 11     | 40.1      | 9.7      | 24.3      | 33.7      | 13.5     | 12.5     | 2.27     | 30                          | 11.4     |
|                | 9              | 0.2                         | 2.8                         | 3          | 11     | 40.8      | 9.1      | 22.3      | 33        | 13.5     | 12.6     | 2.34     | 20                          | 15.7     |
|                | 10             | 0.3                         | 3                           | 4          | 13     | 43.7      | 12.8     | 29.3      | 29.3      | 12.8     | 12.2     | 1.67     | 250                         | 19       |
|                | 10             | 0.6                         | 2.5                         | 5          | 10     | 42.5      | 18.9     | 44.4      | 30.5      | 12.9     | 13.2     | 2.03     | 450                         | 16.2     |
|                | 11             | 1.1                         | 3.2                         | 3          | 14     | 43        | 10.5     | 24.3      | 30.7      | 13.2     | 11.3     | 1.95     | 140                         | 15.4     |

WBC: white blood cells; RBC: red blood cells; Hgb: hemoglobin; HCT: hematocrit; MCV: mean cell volume; MCH: mean corpuscular hemoglobin content; MCHC: mean corpuscular hemoglobin concentration; CHCM: cell hemoglobin concentration mean; CH: corpuscular hemoglobin; RDW: red cell distribution width; HDW: hemoglobin distribution width; PLT: platelets; MPV: mean platelet volume.
