# Supplementary material
Source: PubMed Central journal article supplement (PMC3964478)
Supplement: NIHMS454927-supplement-23.pdf [file NIHMS454927-supplement-23.pdf]

**Supplementary Table 4.** Frequency of long-term culture-initiating cells (LTC-IC) in the blood of the indicated mice after G-CSF mobilization.

| <b>Treatment</b> | <b>Estimated LTC-IC frequency</b> | <b>Estimated LTC-IC per ml</b> |
|------------------|-----------------------------------|--------------------------------|
| <b>Saline</b>    | 1 in 26 $\mu$ l $\pm$ 3           | 43.47                          |
| <b>6OHDA</b>     | 1 in 116 $\mu$ l* $\pm$ 21        | 8.62                           |

For this analysis serial dilutions of blood (30-5.9 $\mu$ l) were plated in wells (34–70 replicates per dilution) and 4-weeks later each well was assayed for the presence of CFU-C colonies. \*p<0.05. LTC-IC frequency was then calculated using L-calc software (Stem Cell Technologies).
