# Supplementary material
Source: PubMed Central journal article supplement (PMC3964478)
Supplement: NIHMS454927-supplement-24.pdf [file NIHMS454927-supplement-24.pdf]

**Supplementary Table 5.** Similar HSC content in saline or cisplatin-treated mice 16 weeks after transplantation.

| <b>Treatment</b> | <b>Estimated CRU frequency</b> | <b>Estimated CRU per femur</b> |
|------------------|--------------------------------|--------------------------------|
| <b>Saline</b>    | 1 in 227,371 ± 87,941          | 53.6± 10.2                     |
| <b>Cisplatin</b> | 1 in 290,367 ± 114,234         | 35.4± 1.9                      |

For this analysis serial BMNC dilutions ( $50 \times 10^4$ – $2 \times 10^4$  cells) purified from saline or cisplatin-treated mice 16 weeks after transplantation were mixed with  $2 \times 10^5$  BMNC CD45.2<sup>+</sup> competitor cells and transplanted into CD45.2<sup>+</sup> recipients (n=5–8 mice per dilution); 16 weeks later the percentage of donor (CD45.1<sup>+</sup>) cells in the blood was determined by flow cytometry. Mice with more than 0.5% engraftment were considered positive. The frequency of competitive repopulating units (CRU) was then calculated using L-calc software (Stem Cell Technologies).
