# Supplementary material
Source: PubMed Central journal article supplement (PMC3964478)
Supplement: NIHMS454927-supplement-25.pdf [file NIHMS454927-supplement-25.pdf]

**Supplementary Table 6.** 4-MC increases repopulation ability in cisplatin-treated mice, 4 weeks after transplantation.

| <b>Treatment</b>        | <b>Percentage of donor engraftment</b> | <b>RU per 10<sup>5</sup> BMNC</b> | <b>Estimated RU per femur</b> |
|-------------------------|----------------------------------------|-----------------------------------|-------------------------------|
| <b>Saline</b>           | 41.51 ± 4.37 <sup>&amp;</sup>          | 0.76 ± 0.13                       | 40.87 ± 6.85                  |
| <b>Saline + 4 MC</b>    | 31.84 ± 4.22 <sup>&amp;</sup>          | 0.5 ± 0.1                         | 22.64 ± 4.43                  |
| <b>Cisplatin</b>        | 30.79 ± 3.56 <sup>&amp;*</sup>         | 0.47 ± 0.08                       | 7.04 ± 1.2                    |
| <b>Cisplatin + 4-MC</b> | 66.37 ± 4.93                           | 2.56 ± 0.64                       | 54.11 ± 9.69                  |

For this analysis 10<sup>5</sup> BMNC (CD45.1<sup>+</sup>) purified from saline, saline + 4-MC, cisplatin or cisplatin + 4-MC treated mice 4 weeks after transplantation were mixed with 10<sup>5</sup> BMNC CD45.2<sup>+</sup> competitor cells and transplanted into CD45.2<sup>+</sup> recipients; 16 weeks later the percentage of donor (CD45.1<sup>+</sup>) cells in the blood was determined by flow cytometry and the repopulating unit (RU) frequency calculated (n=6-8). \*p<0.05 when compared to saline-treated mice; <sup>&</sup>p<0.05 when compared to cisplatin + 4-MC treated mice. Please note that to reduce the number of experimental mice used, the experiments shown in table S2 and S5 were performed simultaneously. Hence saline or cisplatin-treated mice in table S2 are the same as those in table S5.
