# Supplementary material
Source: PubMed Central journal article supplement (PMC3964478)
Supplement: NIHMS454927-supplement-26.pdf [file NIHMS454927-supplement-26.pdf]

**Supplementary Table 7.** 4-MC restores LTC-IC numbers in 6OHDA-treated mice after genotoxic insult. Frequency of long-term culture-initiating cells (LTC-IC) in the BM of the indicated mice 12 days after 5FU injection.

| <b>Treatment</b>     | <b>Estimated LTC-IC frequency</b> | <b>Estimated LTC-IC per femur</b> |
|----------------------|-----------------------------------|-----------------------------------|
| <b>Saline</b>        | 1 in 9348 ± 2183                  | 873.6 ± 92.9                      |
| <b>Saline + 4 MC</b> | 1 in 11055 ± 2635                 | 636.21 ± 97.9                     |
| <b>6OHDA</b>         | 1 in 8295 ± 1921                  | 446.05 ± 31.8                     |
| <b>6OHDA + 4-MC</b>  | 1 in 8062 ± 1866                  | 1054.32 ± 119.6                   |

For this analysis serial BMNC dilutions (22,500-2812 cells) were plated in wells (12 replicates per dilution) and 4-weeks later each well was assayed for the presence of CFU-C colonies. LTC-IC frequency was then calculated using L-calc software (Stem Cell Technologies).
